# Supplementary material for: C–H functionalization of quinoline N-oxides catalyzed by Pd(ii) complexes: a computational study
Source: Royal Society of Chemistry journal article supplement (doi:10.1039/d3cp02445h), 2023-01-01
Supplement: d3cp02445h2.pdf [file d3cp02445h2.pdf]

**Supporting Information**  
**for**

**C-H functionalization of quinoline N-oxides catalyzed by Pd(II)  
complexes: a computational study**

Paulo J. Costa,<sup>a</sup> Frederico F. Martins,<sup>a</sup> Chao Pi,<sup>b</sup> Xiuling Cui,<sup>b</sup> and Maria José Calhorda<sup>a\*</sup>

<sup>a</sup> BioISI - Instituto de Biosistemas e Ciências Integrativas, Departamento de Química e Bioquímica, Faculdade de Ciências, Universidade de Lisboa, Campo Grande, 1749-016 Lisboa, Portugal

<sup>b</sup> College of Chemistry, Henan Key Laboratory of Chemical Biology and Organic Chemistry, Key Laboratory of Applied Chemistry of Henan Universities, Zhengzhou University, Zhengzhou 450052, People's Republic of China

## Contents

|                  | Title                                                                                                                                                                                                                                            | Page |
|------------------|--------------------------------------------------------------------------------------------------------------------------------------------------------------------------------------------------------------------------------------------------|------|
| <b>Table S1</b>  | Experimental results considered for the computational work: reactions of QO with benzaldehyde in dichloroethane.                                                                                                                                 | 3    |
| <b>Figure S1</b> | Energy profile for the initiating steps of the functionalization of QO at C8 (relative Gibbs energies in kcal mol <sup>-1</sup> in dichloroethane).                                                                                              | 4    |
| <b>Scheme S1</b> | Spin density of the benzaldehyde radical ( <b>*COPh</b> , left) and the radical intermediate <b>D</b> (right).                                                                                                                                   | 4    |
| <b>Figure S2</b> | Single crystal X-ray diffraction structure of the complex resulting from the reaction of the unsaturated intermediate <b>C'</b> , [PdCl(QO)], with PPh <sub>3</sub> (distances in Å).                                                            | 5    |
| <b>Figure S3</b> | Energy profile for the second part of the functionalization of QO at C8 in the absence of water (relative Gibbs energies in kcal mol <sup>-1</sup> in dichloroethane).                                                                           | 6    |
| <b>Figure S4</b> | Energy profile for the second part of the alternative functionalization of QO at C8 in the presence of water (relative Gibbs energies in kcal mol <sup>-1</sup> in dichloroethane; distances in Å).                                              | 7    |
| <b>Scheme S2</b> | Hydrogen migration from the C2 position to the oxygen atom of QO (left) and the same migration assisted by a water molecule (right, Gibbs energy, kcal mol <sup>-1</sup> ).                                                                      | 8    |
| <b>Figure S5</b> | Energy profile for isomerization between <b>P1</b> and <b>P2</b> (relative Gibbs energies in kcal mol <sup>-1</sup> in dichloroethane; distances in Å).                                                                                          | 9    |
| <b>Figure S6</b> | Energy profile for the functionalization of QO at C2 (relative Gibbs energies in kcal mol <sup>-1</sup> in dichloroethane; distances in Å).                                                                                                      | 10   |
| <b>Table S2</b>  | Energy Decomposition Analysis (EDA, kcal mol <sup>-1</sup> ) addressing the interaction between QO with PdCl <sub>2</sub> in intermediates <b>A</b> ( $\sigma$ bonding) and <b>L</b> ( $\pi$ bonding).                                           | 11   |
| <b>Table S3</b>  | Free energies in dichloroethane (kcal mol <sup>-1</sup> ) for the C-H activation step of the reaction of QO with benzaldehyde catalyzed by PdCl <sub>2</sub> . The mean absolute error (MAE) relative to the CCSD(T) calculations is also given. | 12   |

**Table S1.** Experimental results considered for the computational work:<sup>1,2</sup> reactions of QO with benzaldehyde in dichloroethane.

| Catalyst                                         | Oxidant                                      | Additive         | T / °C | yield (%) |           |
|--------------------------------------------------|----------------------------------------------|------------------|--------|-----------|-----------|
|                                                  |                                              |                  |        | <b>P1</b> | <b>P2</b> |
| PdCl <sub>2</sub>                                | TBHP <sup>a</sup>                            | -                | 100    | 52        | 45        |
|                                                  | K <sub>2</sub> S <sub>2</sub> O <sub>8</sub> | -                | 100    | nd        | 48        |
|                                                  | AgOAc                                        | -                | 100    | nd        | nd        |
|                                                  | BQ                                           | -                | 100    | nd        | nd        |
|                                                  | DTBP                                         | -                | 100    | nd        | 48        |
|                                                  | TBHP <sup>b</sup>                            | -                | 100    | nd        | 80        |
|                                                  | TBHP <sup>b</sup>                            | H <sub>2</sub> O | 100    | 76        | nd        |
|                                                  | TBHP <sup>b</sup>                            | H <sub>2</sub> O | 80     | 70        | nd        |
|                                                  | TBHP <sup>b</sup>                            | H <sub>2</sub> O | 120    | 80        | nd        |
|                                                  | TBHP <sup>b</sup>                            | H <sub>2</sub> O | 140    | 90        | nd        |
| Pd(OAc) <sub>2</sub>                             | TBHP <sup>a</sup>                            | -                | 100    | traces    | 30        |
| <sup>a</sup> 70 aq.% <sup>b</sup> 5-6M in decane |                                              |                  |        |           |           |

- (a) X. Chen, X. Cui and Y. Wu, *Org. Lett.* 2016, **18**, 2411–2414. (b) Chen, X.; Cui, X.; Wu, Y. *Org. Lett.* 2016, **18**, 3722-3725.
- J. Wu, X. Cui, L. Chen L., G. Jiang, Y. Wu, *J. Am. Chem. Soc.* 2009, **131**, 13888-13889.

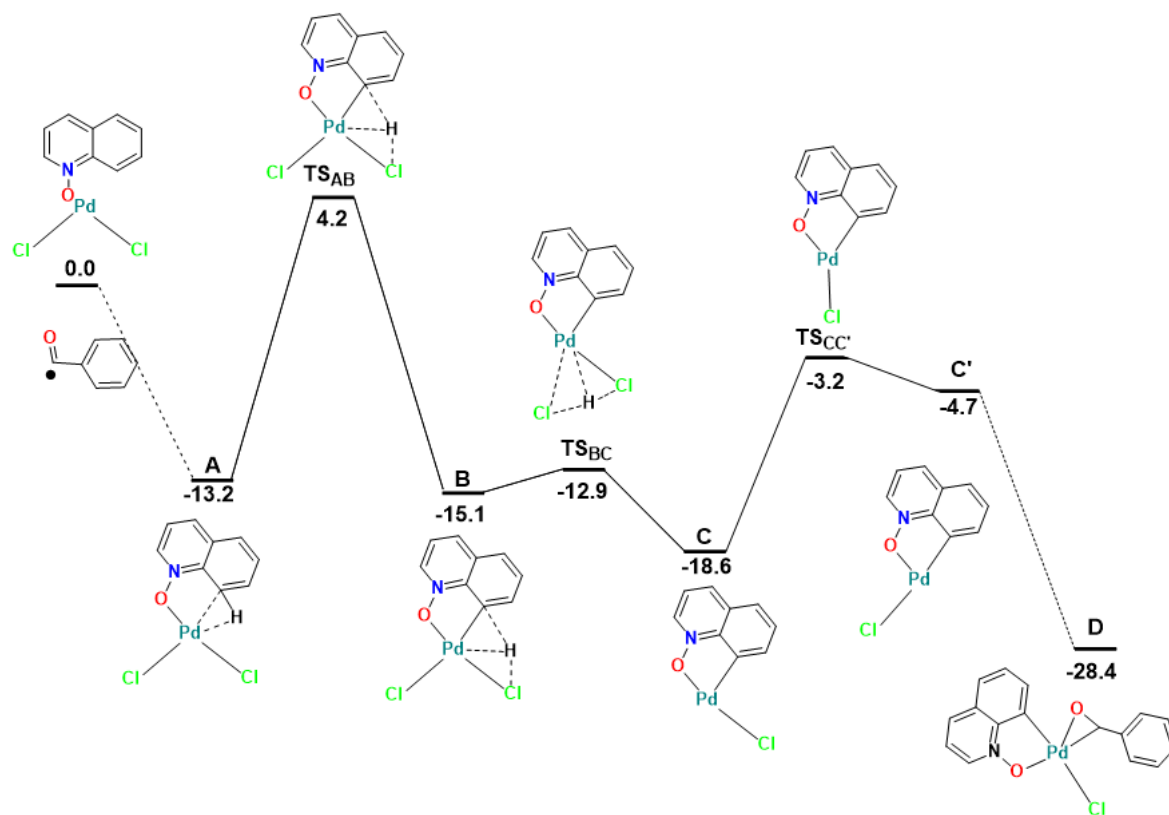

**Figure S1.** Energy profile for the initiating steps of the functionalization of QO at C8 (relative Gibbs energies in kcal mol<sup>-1</sup> in dichloroethane).

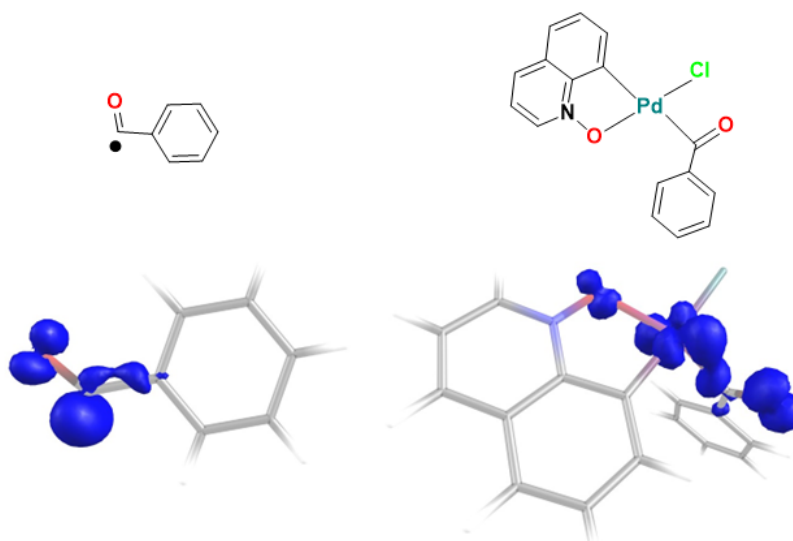

**Scheme S1.** Spin density of the benzaldehyde radical (<sup>•</sup>COPh, left) and the radical intermediate D (right).

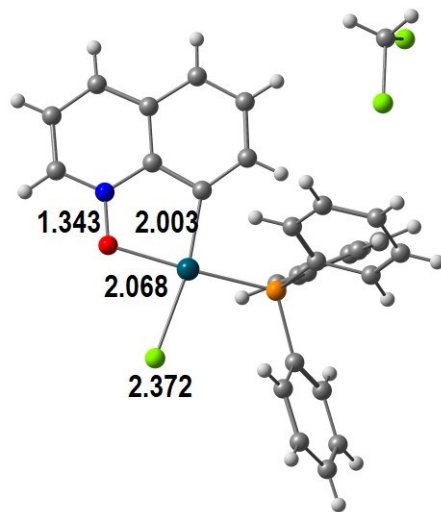

**Figure S2.** Single crystal X-ray diffraction structure (REFCODE INOZOC<sup>1</sup>) of the complex resulting from the reaction of the unsaturated intermediate **C'**, [PdCl(QO)], with PPh<sub>3</sub> (distances in Å).<sup>2</sup>

- 1 C. R. Groom, I. J. Bruno, M. P. Lightfoot, S. C. Ward, The Cambridge Structural Database, *Acta Cryst.* 2016, **B72**, 171-179.
- 2 X. Chen, X. Cui and Y. Wu, *Org. Lett.* 2016, **18**, 2411–2414.

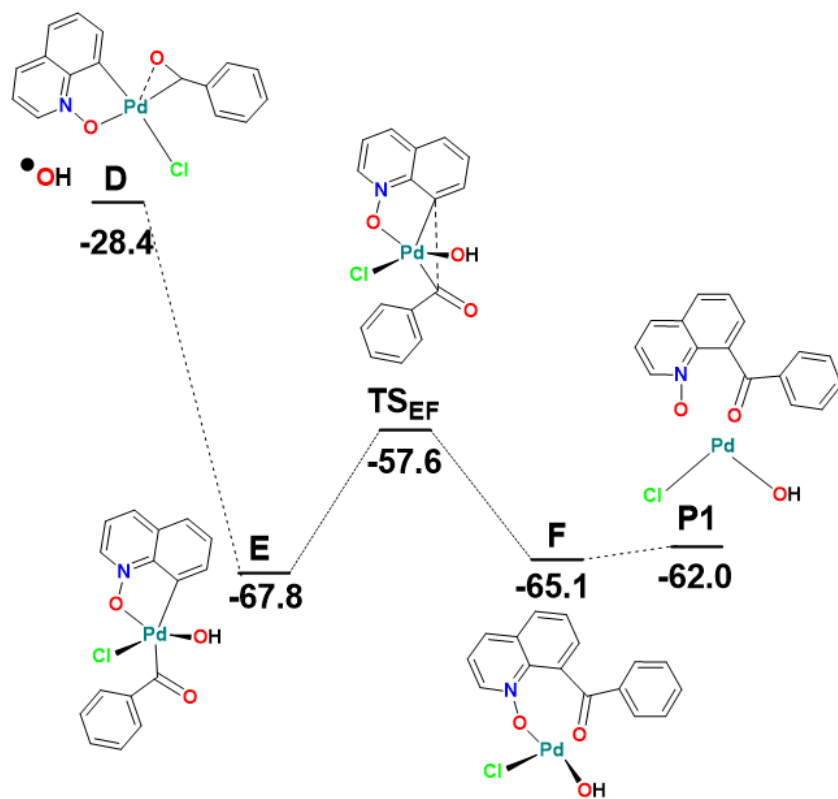

**Figure S3.** Energy profile for the second part of the functionalization of QO at C8 in the absence of water (relative Gibbs energies in kcal mol<sup>-1</sup> in dichloroethane).

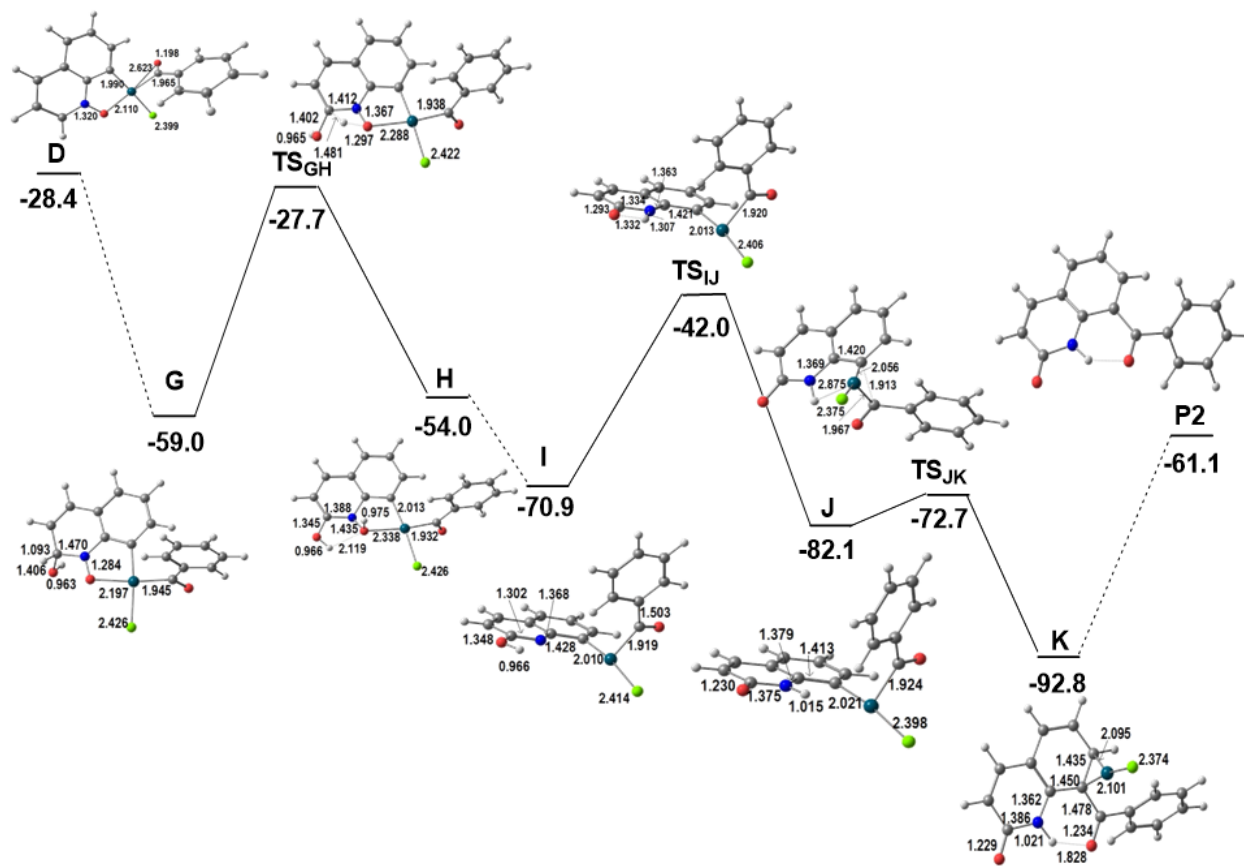

**Figure S4.** Energy profile for the second part of the alternative functionalization at C8 and functionalization at C2 of QO in the presence of water (relative Gibbs energies in kcal mol<sup>-1</sup> in dichloroethane; distances in Å).

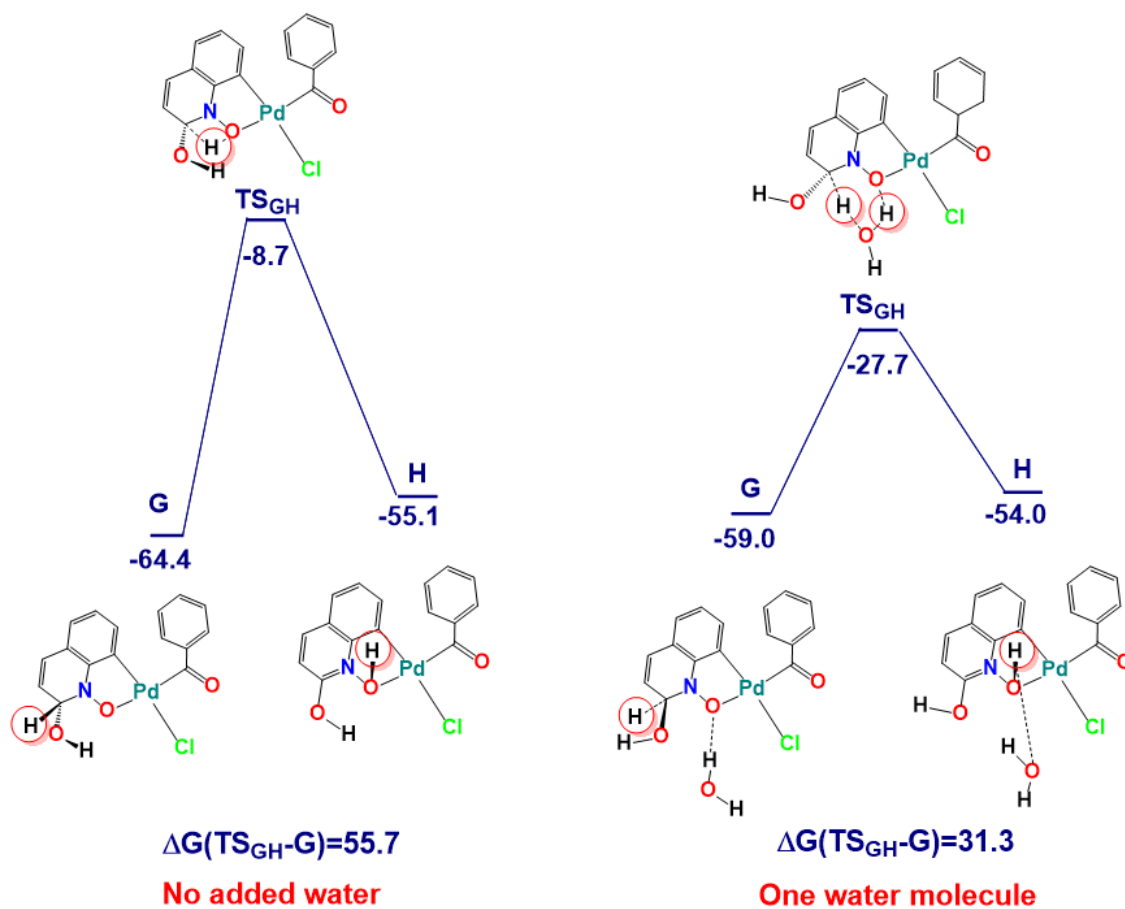

**Scheme S2.** Hydrogen migration from the C2 position to the oxygen atom of QO (left) and the same migration assisted by a water molecule (right, relative Gibbs energy in dichloroethane, kcal mol<sup>-1</sup>).



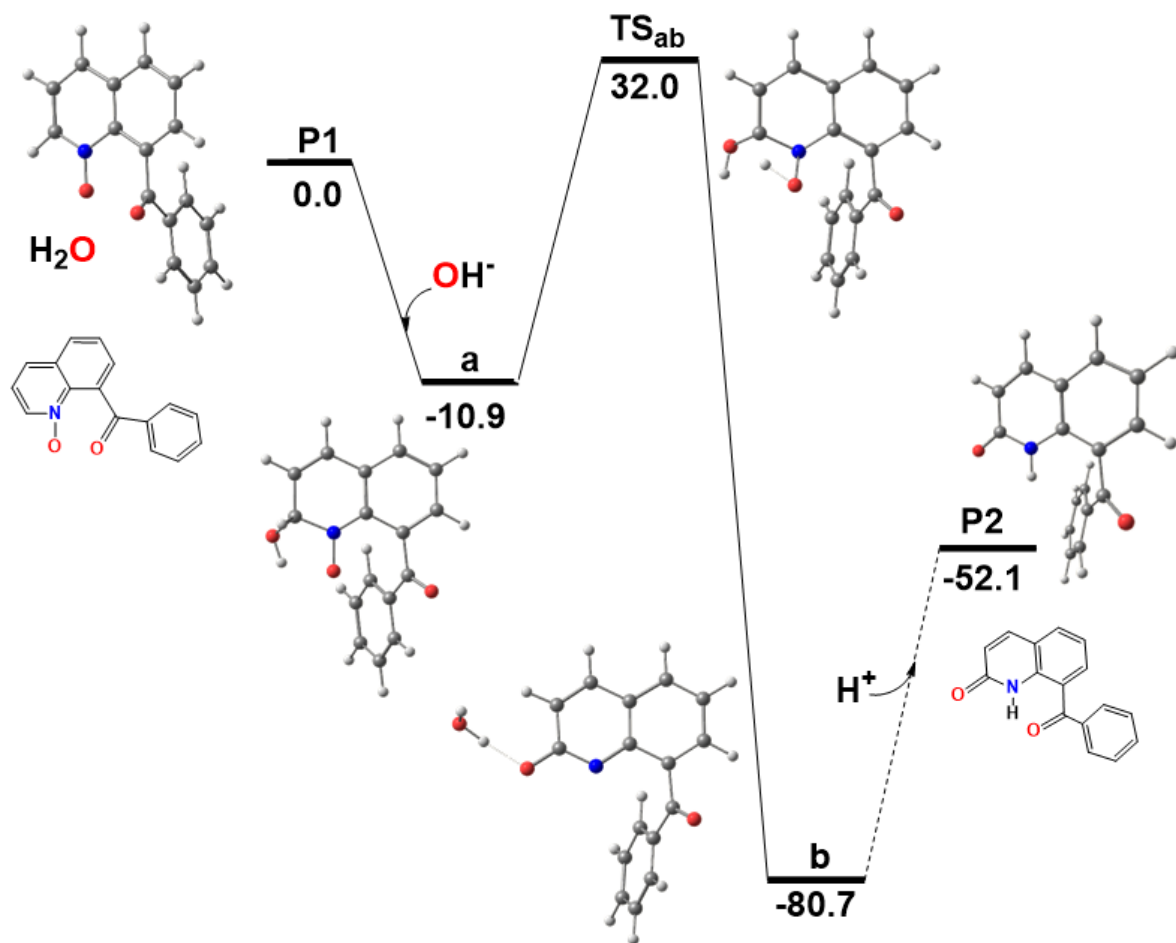

**Figure S5.** Energy profile for isomerization between **P1** and **P2** (relative Gibbs energies in kcal mol<sup>-1</sup> in dichloroethane; distances in Å).

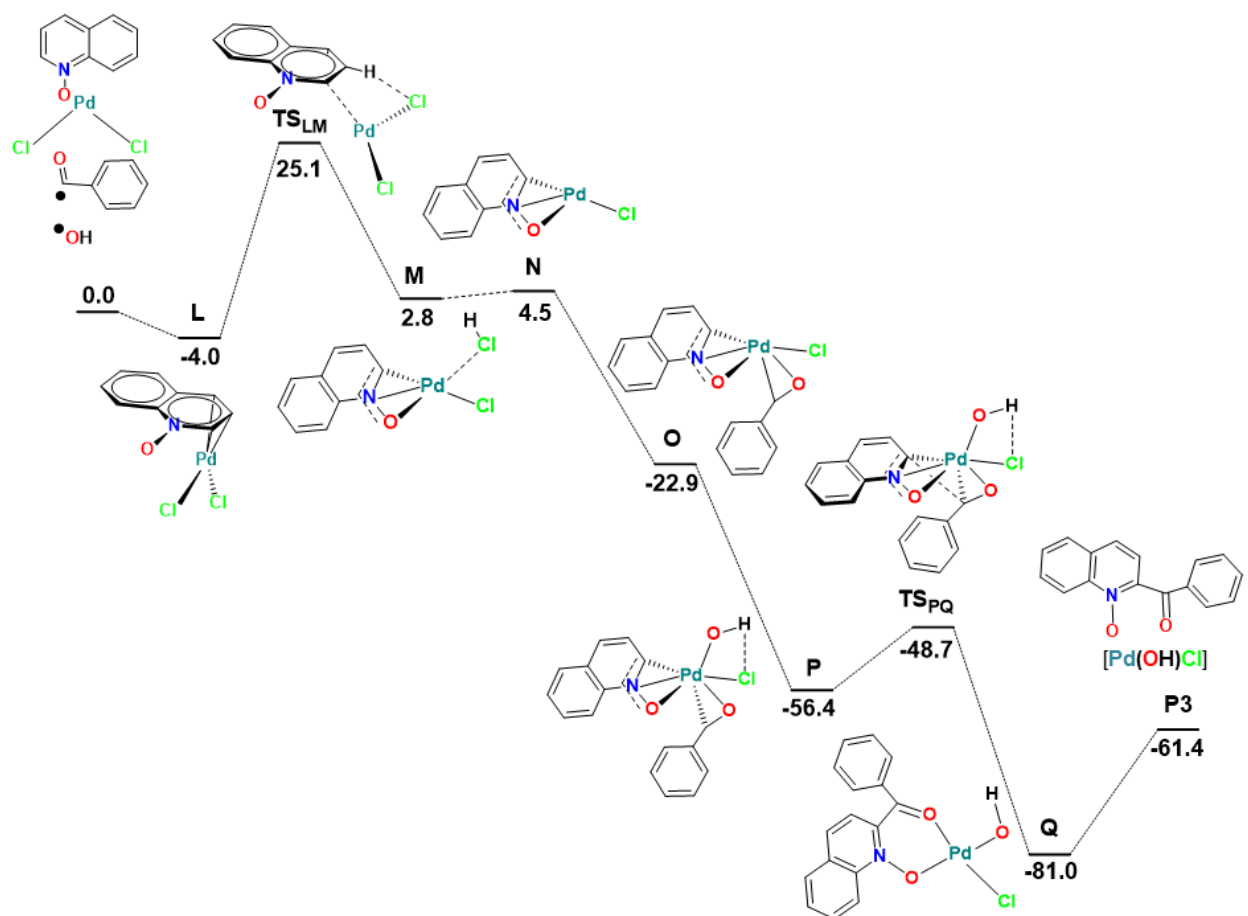

**Figure S6.** Energy profile for the functionalization of QO at C2 (relative Gibbs energies in kcal mol<sup>-1</sup> in dichloroethane; distances in Å).

**Table S2.** Energy Decomposition Analysis (EDA, kcal mol<sup>-1</sup>) addressing the interaction between QO with PdCl<sub>2</sub> in intermediates **A** ( $\sigma$  bonding) and **L** ( $\pi$  bonding).

|                                           | <b>A</b>     | <b>L</b>     |
|-------------------------------------------|--------------|--------------|
| $\Delta E_{\text{Pauli}}$                 | 154.6        | 146.3        |
| $\Delta E_{\text{elec}}$                  | -126.9       | -91.2        |
| $\Delta E_{\text{oi}}$                    | -74.22       | -90.3        |
| $\Delta E_{\text{solv}}$                  | -5.12        | 3.5          |
| <b><math>\Delta E_{\text{int}}</math></b> | <b>-51.6</b> | <b>-38.7</b> |
| $\Delta E_{\text{prepQO}}$                | 12.4         | 7.3          |
| $\Delta E_{\text{prepPdCl}_2}$            | 2.5          | 3.0          |
| $\Delta E_{\text{prep}}$                  | 14.9         | 10.3         |
| <b>BE</b>                                 | <b>-36.7</b> | <b>-28.4</b> |

In the Energy Decomposition Analysis (EDA), the interaction energy is divided in different energy terms. The interaction energy ( $\Delta E_{\text{int}}$ ), defined as the difference between the energy of the molecule and the sum of the energy of the two fragments (with the same geometry), is split into three terms.  $\Delta E_{\text{Pauli}}$  is the repulsive contribution from the interaction between occupied orbitals,  $\Delta E_{\text{elec}}$  corresponds to the classical electrostatic interaction between the charge distributions of the fragments, and  $\Delta E_{\text{oi}}$  represents the charge transfer between fragments (covalent interaction). When the solvent is considered in the calculations, another term must be added ( $\Delta E_{\text{solv}}$ ).

$$\Delta E_{\text{int}} = \Delta E_{\text{Pauli}} + \Delta E_{\text{elec}} + \Delta E_{\text{oi}} (+ \Delta E_{\text{solv}})$$

The interaction energy can be related to the bonding energy (BE), defined for **A** (or other species) as the energy difference between the energy of the molecule and the sum of the energies of the fragments after they have relaxed to their minimum energy. The energy difference between the fragment with its geometry in the complex and after relaxation is called  $\Delta E_{\text{prepF}}$ , the sum for the two fragments being  $\Delta E_{\text{prep}}$ .

$$\text{BE} = E_{\text{A}} - (E_{\text{QO}} + E_{\text{PdCl}_2}) = \Delta E_{\text{int}} + \Delta E_{\text{prep}}$$

**Table S3.** Free energies in dichloroethane (kcal mol<sup>-1</sup>) for the C-H activation step of the reaction of QO with benzaldehyde catalyzed by PdCl<sub>2</sub>. The mean absolute error (MAE) relative to the CCSD(T) calculations is also given.

| Method / Species        | CCSD(T) /def2-tzvpp | M06-2X(D3)/def2-tzvpp | M06-2X(D3)/6-311G** | PBE0 /6-311G** | PBE0(D3) /6-311G** | PBE0(D3) /def2-tzvpp |
|-------------------------|---------------------|-----------------------|---------------------|----------------|--------------------|----------------------|
| <b>PdCl<sub>2</sub></b> | <b>0.0</b>          | 0.00.0                | 0.0                 | 0.0            | 0.0                | 0.0                  |
| <b>A</b>                | <b>-12.51</b>       | -6.16                 | -9.80               | -12.60         | -16.85             | -13.17               |
| <b>TS<sub>AB</sub></b>  | <b>3.99</b>         | 14.61                 | 12.34               | 6.66           | 1.98               | 4.20                 |
| <b>B</b>                | <b>-18.57</b>       | -10.86                | -13.19              | -13.25         | -17.52             | -15.07               |
| MAE                     | <b>0</b>            | 8.2                   | 5.48                | 2.6            | 2.5                | 1.5                  |
